# Supplementary material for: A novel trityl/acridine derivatization agent for analysis of thiols by (matrix-assisted)(nanowire-assisted)laser desorption/ionization and electrospray ionization mass spectrometry
Source: Royal Society of Chemistry journal article supplement (doi:10.1039/c7ay01965c), 2017-01-01

## Novel trityl/acridine derivatization agent for analysis of thiols by (matrix-assisted)(nanowire-assisted)laser desorption/ionization and electrospray ionization mass spectrometry

Artyom P. Topolyan,<sup>\*a</sup> Mariya A. Belyaeva,<sup>a</sup> Mariya S. Slyundina,<sup>b</sup> Valentina V. Ilyshenkova,<sup>b</sup> Andrey A. Formanovsky,<sup>a</sup> Vladimir A. Korshun,<sup>a,c</sup> Roman S. Borisov<sup>\*b,d</sup>

<sup>a</sup> Shemyakin-Ovchinnikov Institute of Bioorganic Chemistry, Miklukho-Maklaya 16/10, 117997 Moscow, Russia. E-mail: [artyom.p.topolyan@gmail.com](mailto:artyom.p.topolyan@gmail.com)

<sup>b</sup> Topchiev Institute of Petrochemical Synthesis, Leninsky Prospekt 29, 119991 Moscow, Russia. E-mail: [borisov@ips.ac.ru](mailto:borisov@ips.ac.ru)

<sup>c</sup> Gause Institute of New Antibiotics, Bolshaya Pirogovskaya 11, 119021 Moscow, Russia

<sup>d</sup> Peoples' Friendship University of Russia, Miklukho-Maklaya 6, 117198 Moscow, Russia

**Figure S1.** NMR spectrum of *in situ* prepared derivatization reagent **3**.

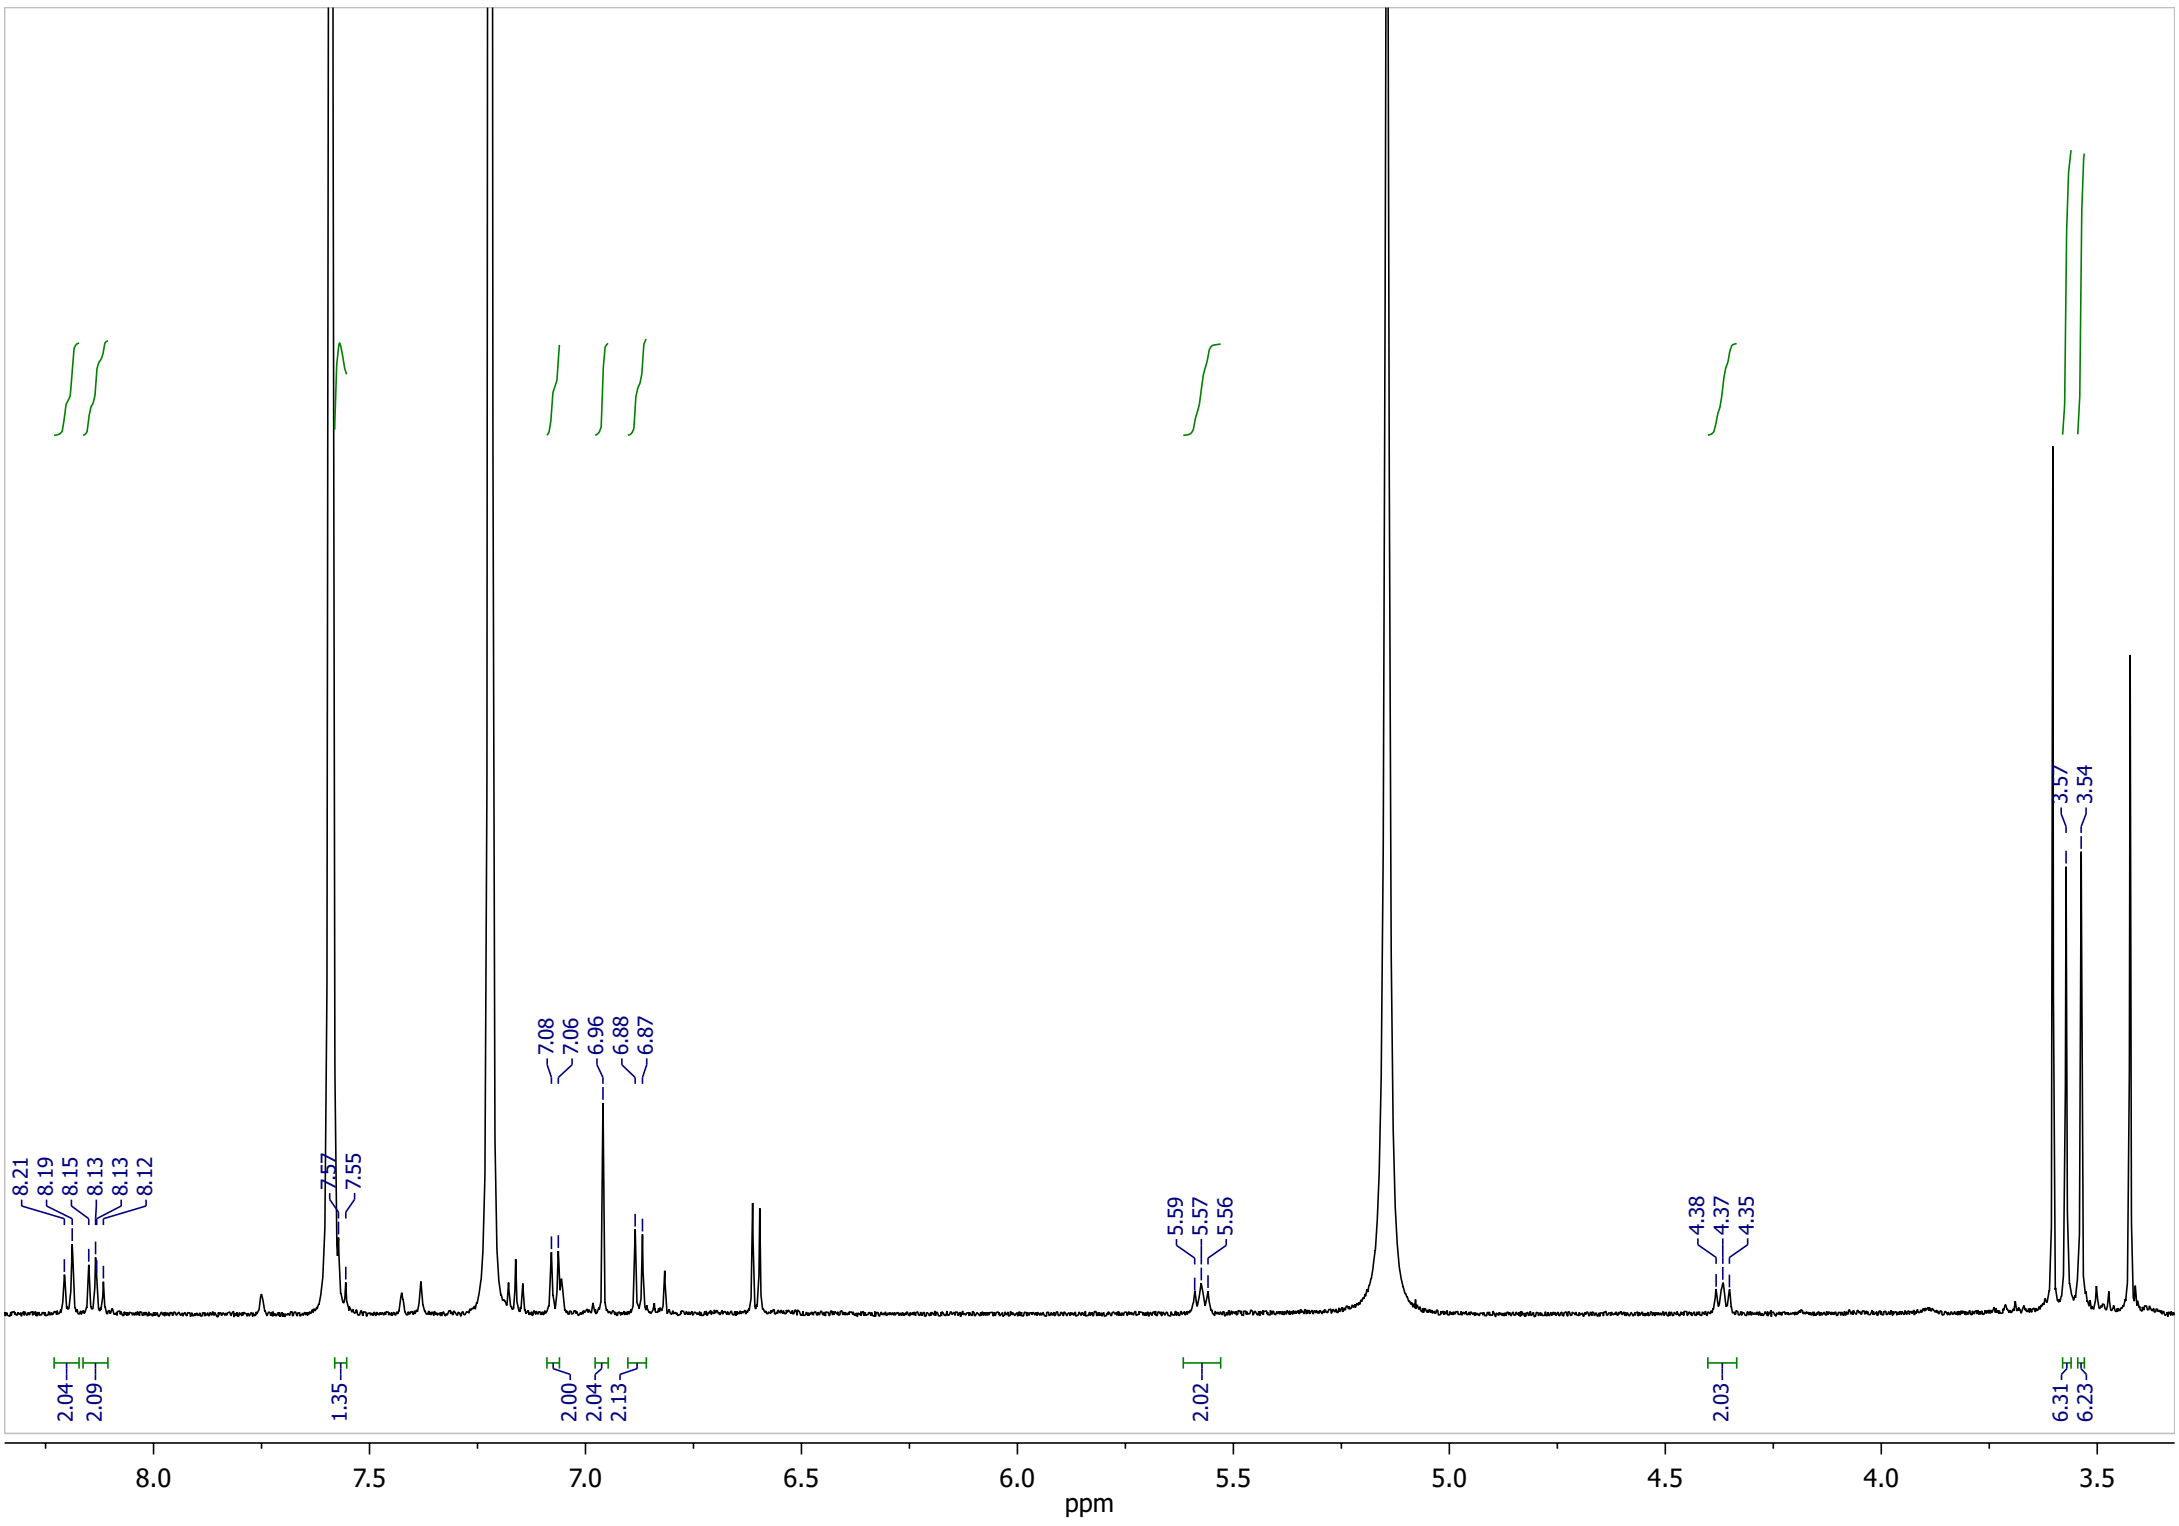

Supplement: c7ay01965c1.pdf [file c7ay01965c1.pdf]
